# Supplementary material for: Intervention Packages for Early Visceral Leishmaniasis Case Detection and Sandfly Control in Bangladesh: A Comparative Analysis
Source: PubMed Central journal article supplement (PMC6335927; doi:10.4269/ajtmh.18-0290), 2018-11-19
Supplement: tpmd180290.SD1.pdf [file tpmd180290.SD1.pdf]

**Supplemental Table 1. Baseline characteristics of the household where entomological efficacy were measured**

| Indicator                             | Female <i>P. argentipes</i> sandfly per household; Mean (SD) [P-value*] |              |         |              |              |         |              |              |         |
|---------------------------------------|-------------------------------------------------------------------------|--------------|---------|--------------|--------------|---------|--------------|--------------|---------|
|                                       | NKTA Arm                                                                |              |         | FC+DWL Arm   |              |         | FC+ITN Arm   |              |         |
|                                       | Intervention                                                            | Control      | P-value | Intervention | Control      | P-value | Intervention | Control      | P-value |
| Unskilled household head; % (n)       | 30.56 (11)                                                              | 19.44 (7)    | 0.276   | 41.67 (15)   | 13.89 (5)    | 0.009   | 30.56 (11)   | 25.00 (9)    | 0.599   |
| Housing materials:                    |                                                                         |              |         |              |              |         |              |              |         |
| Mud wall                              | 8.33 (3)                                                                | 25.00 (9)    | 0.058   | 11.11 (4)    | 30.56 (11)   | 0.042   | 13.89 (5)    | 2.78 (1)     | 0.088   |
| Mud floor                             | 72.22 (26)                                                              | 86.11 (31)   | 0.147   | 100.0 (36)   | 88.89 (32)   | 0.040   | 80.56 (29)   | 86.11 (31)   | 0.527   |
| Damp floor                            | 0.0 (0)                                                                 | 0.0 (0)      | –       | 2.78 (1)     | 0.0 (0)      | 1.000   | 2.78 (1)     | 0.0 (0)      | 1.000   |
| Cracks in wall                        | 11.11 (4)                                                               | 25.0 (9)     | 0.126   | 25.0 (9)     | 33.33 (12)   | 0.437   | 25.0 (9)     | 5.56 (2)     | 0.022   |
| Mean (SD) humidity in the living room | 75.68 (5.97)                                                            | 70.43 (3.72) | < 0.001 | 79.18 (5.29) | 69.14 (4.75) | < 0.001 | 68.38 (5.80) | 68.11 (2.98) | 0.809   |
| Having cattle shed                    | 25.0 (9)                                                                | 44.44 (16)   | 0.083   | 50.0 (18)    | 61.11 (22)   | 0.343   | 47.22 (17)   | 47.22 (17)   | 1.000   |

NKTA = No Kala-azar Transmission Activity; FC+DWL = Fever Camp and Installation of Durable Wall Lining; FC+ITN = Fever Camp and Insecticide Treated Net.
